# Supplementary material for: Evaluation of Lipopolysaccharide and Interleukin-6 as Useful Screening Tool for Chronic Endometritis
Source: MDPI journal article supplement (doi:10.3390/ijms25042017), 2024-02-07
Supplement: s1 [file s1]

|                                  | Control patients   | Patients with suspected CE | <i>P-value</i> |
|----------------------------------|--------------------|----------------------------|----------------|
| <b>Number</b>                    | 15                 | 13                         |                |
| <b>Characteristics</b>           |                    |                            |                |
| Age                              | 35.1 ± 0.94(29-41) | 35.3 ± 1.15(27-42)         | 0.91           |
| BMI                              | 25.6 ± 1.71        | 21.5 ± 0.67                | 0.17           |
| Smoking, n (%)                   | 2/15(13.3)         | 0/13(0.0)                  | 0.48           |
| <b>Plasma concentration</b>      |                    |                            |                |
| Estradiol (pg/ml)                | 279.1 ± 59.2       | 393.3 ± 85.3               | 0.24           |
| Progesterone (ng/ml)             | 1.04 ± 0.20        | 1.09 ± 0.59                | 0.15           |
| LH (mIU/ml)                      | 23.8 ± 6.40        | 20.1 ± 6.68                | 0.83           |
| FSH (mIU/ml)                     | 11.1 ± 1.71        | 9.0 ± 1.35                 | 0.37           |
| <b>Supernatant concentration</b> |                    |                            |                |
| Menstrual cycle                  | 12.9 ± 0.63        | 21.6 ± 1.31                | <0.05          |
| Estradiol (pg/ml)                | 104.1 ± 18.09      | 41.7 ± 7.82                | <0.05          |
| Progesterone (ng/ml)             | 1.27 ± 0.27        | 6.29 ± 1.60                | <0.05          |
| <b>Vaginal culture</b>           |                    |                            |                |
| Lactobacillus spp., n (%)        | 4/15(26.7)         | 3/13(23.1)                 | 1.00           |
| Escherichia coli, n (%)          | 2/15(13.3)         | 2/13(15.4)                 | 1.00           |
| Others, n (%)                    | 10/15(66.7)        | 7/13(53.8)                 | 0.70           |

Table S1. Clinical characteristics of the patients. One patient with CE was not examined for plasma concentration and vaginal culture. Abbreviations: BMI (Body Mass Index). The values are shown as mean ± SEM and  $P < 0.05$ .

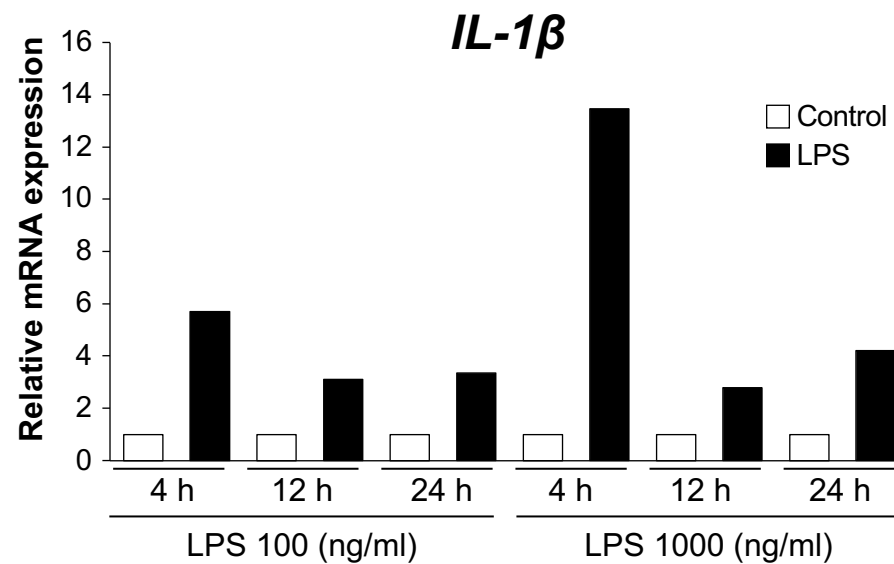

**Figure S1.** IL-1 $\beta$  gene expression for 4, 12, and 24 h using EM-E6/E7/hTERT-2 cells. The cells were then treated with LPS (0, 100, and 1000 ng/ml). The experiments were conducted once. The values are shown as the mean  $\pm$  SEM.

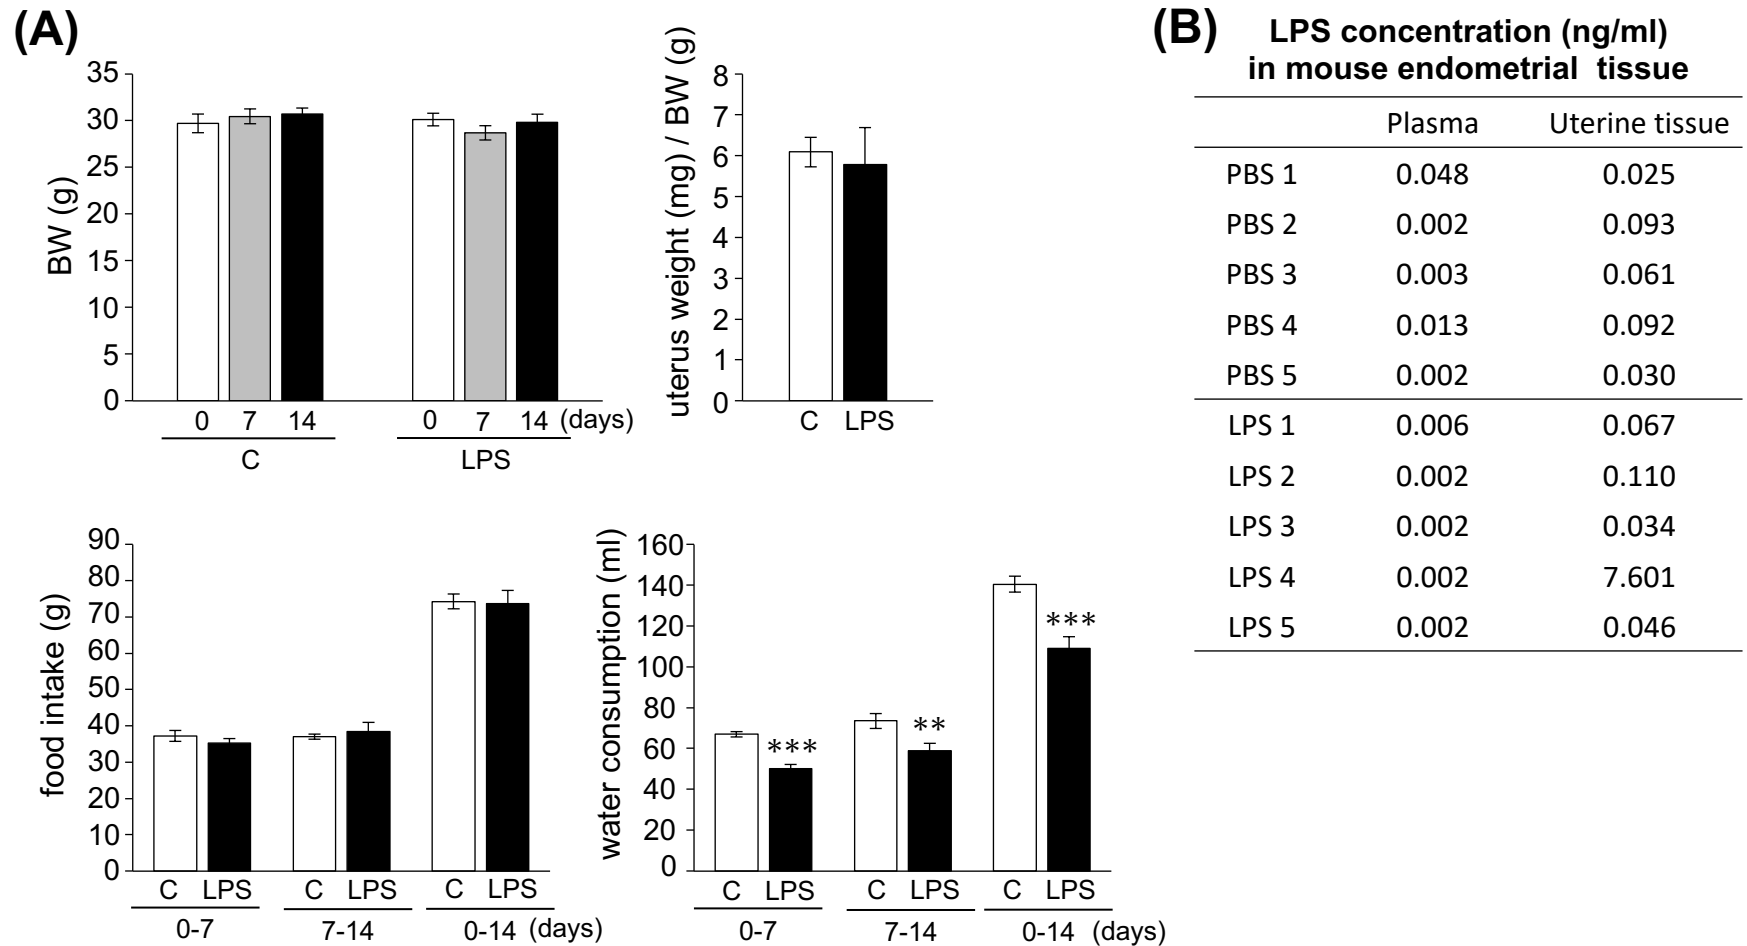

Figure S2. Physiological effects of LPS in mice (A) Mouse body weight (BW), uterine weight/BW, food intake, and water consumption (control,  $n = 5$ ; LPS group,  $n = 5$ ). (B) Concentration of LPS in plasma and uterine tissue. Values are shown as the mean  $\pm$  SEM; \*\*  $P < 0.01$ , \*\*\*  $P < 0.005$ .

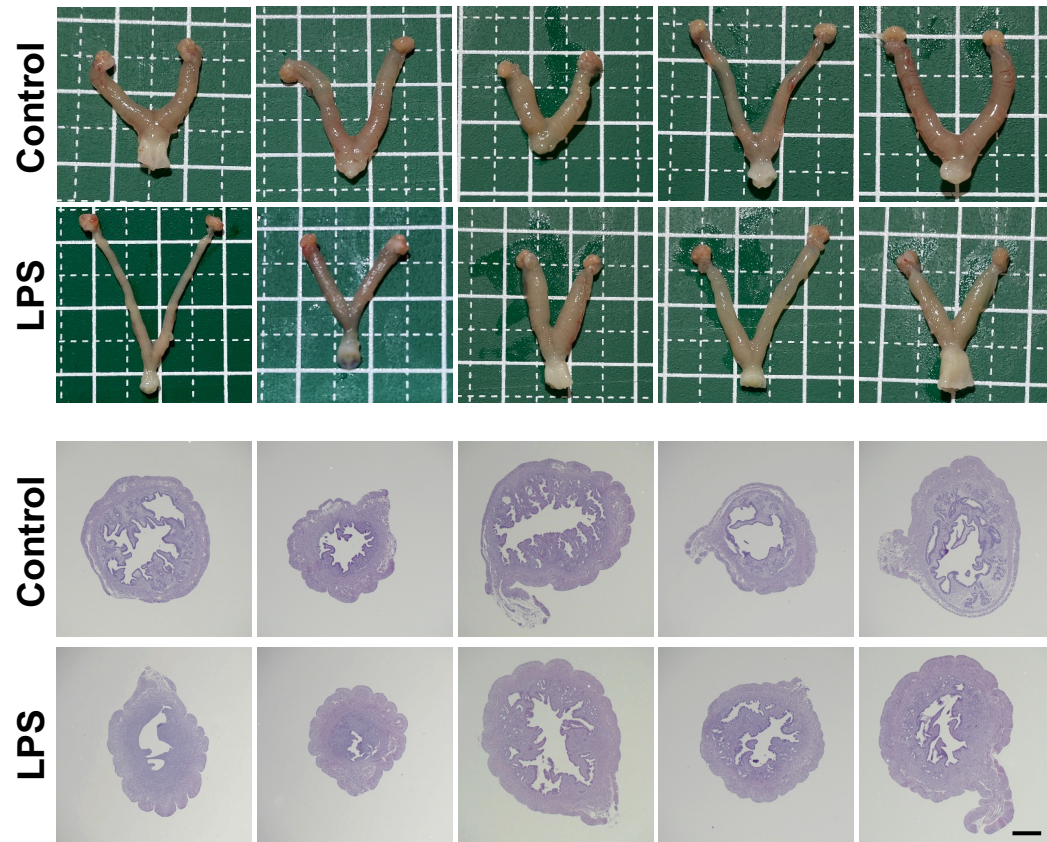

Figure S3. Histology of the uterus after PBS and LPS administration (control n = 5, LPS group n = 5). ( $\times 40$ ) with Scale bar = 50  $\mu\text{m}$ .

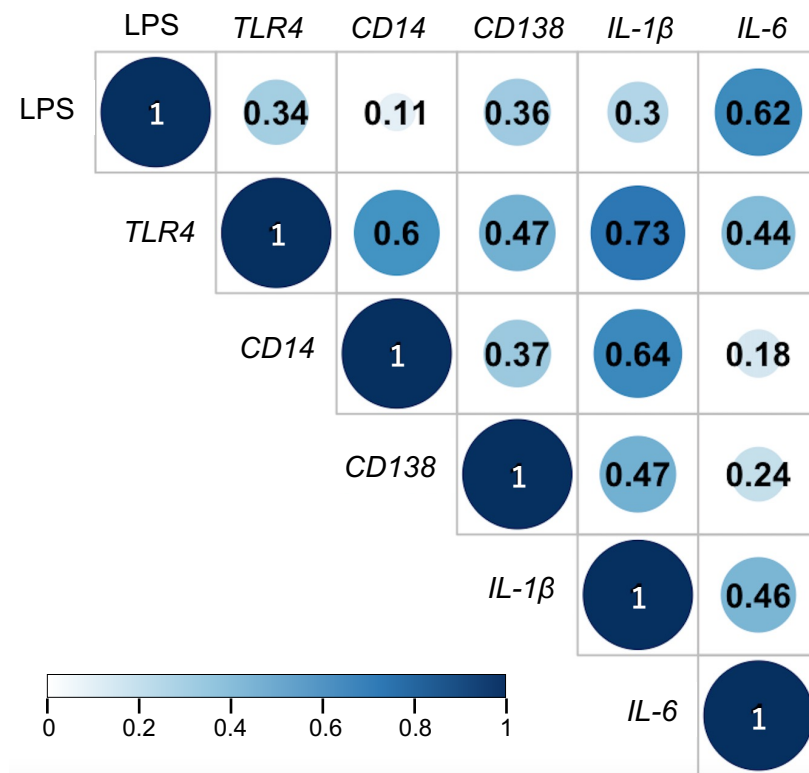

Figure S4. Correlation coefficients between LPS and inflammatory markers in human endometrial tissue (n = 23).

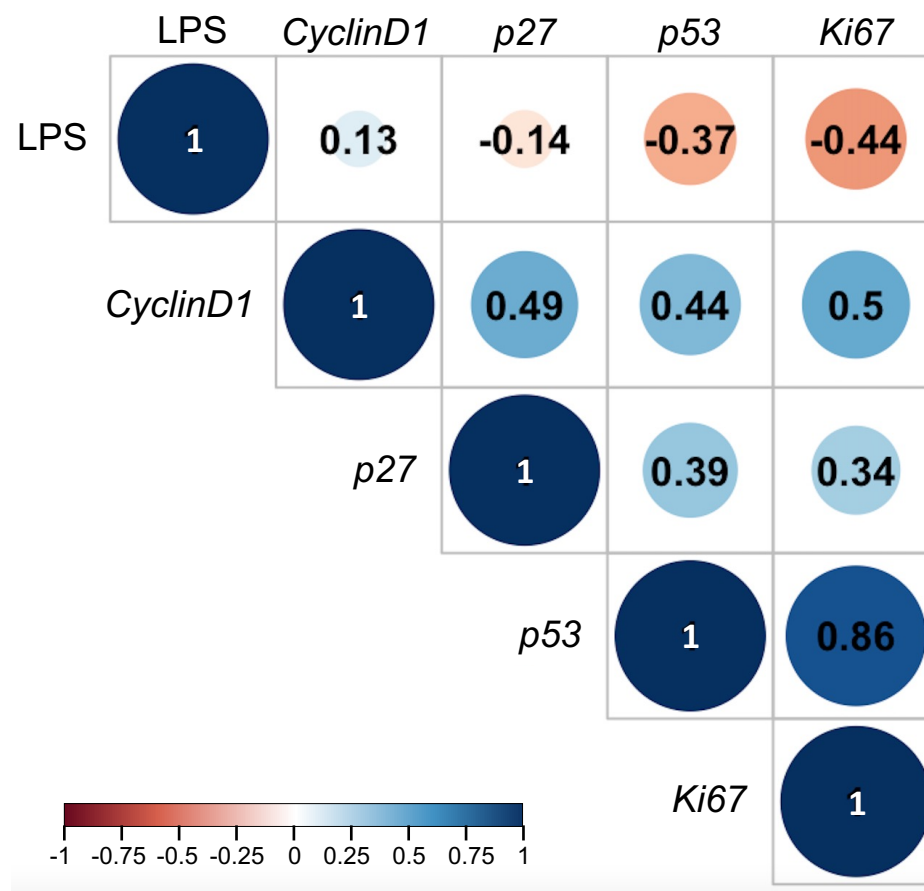

Figure S5. Correlation coefficients between LPS and cell cycle markers in human endometrial tissue (n = 23).
